# Supplementary material for: A Cyclic AMP Analog, 8-Br-cAMP, Enhances the Induction of Pluripotency in Human Fibroblast Cells
Source: Springer Nature journal article supplement (doi:10.1007/s12015-010-9209-3), 2010-11-30
Supplement: MOESM1 [file 12015_2010_9209_MOESM1_ESM.xls]

## Sheet: at_least_up6_down4_reordered
search_key	HFF1	A4	B4	C1	H1	TargetID	Definition
ILMN_177949	8.96425	3.77074	3.80691	3.59429	3.14941	ANKRD29	Homo sapiens ankyrin repeat domain 29 (ANKRD29), mRNA.
ILMN_8514	8.60935	3.93683	3.83227	3.19692	3.06482	COPZ2	Homo sapiens coatomer protein complex, subunit zeta 2 (COPZ2), mRNA.
ILMN_22925	8.51752	3.53508	3.34653	3.28781	2.66892	IFIT3	Homo sapiens interferon-induced protein with tetratricopeptide repeats 3 (IFIT3), mRNA.
ILMN_22200	9.41441	3.84385	2.57549	3.72979	3.44774	WNT2	Homo sapiens wingless-type MMTV integration site family member 2 (WNT2), mRNA.
ILMN_10640	7.54041	3.53946	2.71253	3.01624	4.33877	LOC492311	Homo sapiens similar to bovine IgA regulatory protein (LOC492311), mRNA.
ILMN_25186	7.49984	3.00282	3.11253	3.60518	3.83076	RNASEL	Homo sapiens ribonuclease L (2',5'-oligoisoadenylate synthetase-dependent) (RNASEL), mRNA.
ILMN_1368	7.59833	3.87866	2.72723	3.92506	3.60368	OLFML1	Homo sapiens olfactomedin-like 1 (OLFML1), mRNA.
ILMN_23216	8.37171	3.68911	3.64397	4.11354	3.33343	SGIP1	Homo sapiens SH3-domain GRB2-like (endophilin) interacting protein 1 (SGIP1), mRNA.
ILMN_17288	8.19162	3.71699	3.66407	3.96965	3.96701	CXORF6	Homo sapiens chromosome X open reading frame 6 (CXorf6), mRNA.
ILMN_19125	8.21657	4.46059	4.0202	4.18818	2.66742	RUNX1	Homo sapiens runt-related transcription factor 1 (acute myeloid leukemia 1; aml1 oncogene) (RUNX1), transcript variant 1, mRNA.
ILMN_176925	8.02877	4.32053	3.83872	4.03763	2.64937	GREM1	Homo sapiens gremlin 1, cysteine knot superfamily, homolog (Xenopus laevis) (GREM1), mRNA.
ILMN_8141	7.90936	4.21999	3.97808	4.0002	2.9175	SERPINB7	Homo sapiens serpin peptidase inhibitor, clade B (ovalbumin), member 7 (SERPINB7), mRNA.
ILMN_1771	7.65714	4.07496	3.50786	3.89725	2.66162	FGF9	Homo sapiens fibroblast growth factor 9 (glia-activating factor) (FGF9), mRNA.
ILMN_5053	8.57315	4.38539	3.14881	4.28141	2.75896	PSG6	Homo sapiens pregnancy specific beta-1-glycoprotein 6 (PSG6), transcript variant 2, mRNA.
ILMN_165419	8.27513	4.34063	3.54562	4.09761	2.86279	OSMR	Homo sapiens oncostatin M receptor (OSMR), mRNA.
ILMN_15188	8.81487	4.97855	4.79947	4.67732	4.10496	DOCK10	Homo sapiens dedicator of cytokinesis 10 (DOCK10), mRNA.
ILMN_2718	8.84703	5.61159	4.60378	4.622	3.97885	GLS	Homo sapiens glutaminase (GLS), mRNA.
ILMN_21404	8.76769	5.07988	4.39299	3.86138	3.4737	NOV	Homo sapiens nephroblastoma overexpressed gene (NOV), mRNA.
ILMN_7147	8.74316	3.02444	2.72957	2.50152	3.31588	ECM2	Homo sapiens extracellular matrix protein 2, female organ and adipocyte specific (ECM2), mRNA.
ILMN_4021	8.30367	3.13093	2.84315	2.39842	3.43703	LAMA4	Homo sapiens laminin, alpha 4 (LAMA4), mRNA.
ILMN_25683	8.65912	2.71137	3.65385	2.29734	2.29736	SYNC1	Homo sapiens syncoilin, intermediate filament 1 (SYNC1), mRNA.
ILMN_4676	8.07236	2.52576	2.78546	2.65344	2.51856	KCNK2	Homo sapiens potassium channel, subfamily K, member 2 (KCNK2), transcript variant 1, mRNA.
ILMN_2904	7.51164	2.3533	2.42898	2.12607	2.89141	CNTN3	Homo sapiens contactin 3 (plasmacytoma associated) (CNTN3), mRNA.
ILMN_3001	7.34465	3.19359	2.77271	2.54316	3.09578	PTGS1	Homo sapiens prostaglandin-endoperoxide synthase 1 (prostaglandin G/H synthase and cyclooxygenase) (PTGS1), transcript variant 2, mRNA.
ILMN_20454	6.85544	2.92541	2.70031	2.28878	3.11178	SSPN	Homo sapiens sarcospan (Kras oncogene-associated gene) (SSPN), mRNA.
ILMN_11485	7.31814	3.94535	3.52298	2.47321	2.20542	RAB7B	Homo sapiens RAB7B, member RAS oncogene family (RAB7B), mRNA.
ILMN_26086	8.5699	3.03494	2.0522	3.66813	3.39776	WFDC1	Homo sapiens WAP four-disulfide core domain 1 (WFDC1), mRNA.
ILMN_28413	8.04425	3.82974	2.32358	2.93832	2.96554	GBP1	Homo sapiens guanylate binding protein 1, interferon-inducible, 67kDa (GBP1), mRNA.
ILMN_22030	8.90674	3.11679	2.49053	2.67657	2.379	OSR2	Homo sapiens odd-skipped related 2 (Drosophila) (OSR2), mRNA.
ILMN_4694	7.62592	3.27948	1.7783	4.01427	2.40188	SQRDL	Homo sapiens sulfide quinone reductase-like (yeast) (SQRDL), mRNA.
ILMN_28905	7.60254	2.65746	3.66453	3.92132	2.51315	IFI44	Homo sapiens interferon-induced protein 44 (IFI44), mRNA.
ILMN_11027	7.26376	3.23524	2.89428	3.50925	2.42713	C9ORF150	Homo sapiens chromosome 9 open reading frame 150 (C9orf150), mRNA.
ILMN_181483	8.57883	4.00929	2.77302	2.36727	1.06637	EMX2	Homo sapiens empty spiracles homeobox 2 (EMX2), mRNA.
ILMN_23052	8.75974	3.8675	4.65698	4.4982	3.95118	C1QTNF5	Homo sapiens C1q and tumor necrosis factor related protein 5 (C1QTNF5), mRNA.
ILMN_1437	8.56851	4.04355	4.89152	4.79335	3.80708	C2ORF32	Homo sapiens chromosome 2 open reading frame 32 (C2orf32), mRNA.
ILMN_22727	8.86655	4.37538	4.43846	4.53516	3.64361	NR2F2	Homo sapiens nuclear receptor subfamily 2, group F, member 2 (NR2F2), mRNA.
ILMN_1735	9.4765	4.13415	4.89353	5.15504	3.92755	C10ORF116	Homo sapiens chromosome 10 open reading frame 116 (C10orf116), mRNA.
ILMN_3329	10.2687	2.80803	4.09222	3.66989	3.37137	TNFRSF14	Homo sapiens tumor necrosis factor receptor superfamily, member 14 (herpesvirus entry mediator) (TNFRSF14), mRNA.
ILMN_20483	9.69867	2.68046	3.81807	3.58668	3.21341	GPNMB	Homo sapiens glycoprotein (transmembrane) nmb (GPNMB), transcript variant 1, mRNA.
ILMN_23308	10.0279	3.3528	3.49059	3.83708	3.70208	RECK	Homo sapiens reversion-inducing-cysteine-rich protein with kazal motifs (RECK), mRNA.
ILMN_11927	9.35511	4.30796	3.72946	3.99023	3.96714	FOXF2	Homo sapiens forkhead box F2 (FOXF2), mRNA.
ILMN_27561	9.22175	4.13454	4.04359	3.99416	4.06889	MYLK	Homo sapiens myosin, light chain kinase (MYLK), transcript variant 2, mRNA.
ILMN_17821	8.91435	3.99916	4.09066	4.40382	4.1646	THRA	Homo sapiens thyroid hormone receptor, alpha (erythroblastic leukemia viral (v-erb-a) oncogene homolog, avian) (THRA), transcript variant 2, mRNA.
ILMN_5679	9.20738	3.63659	4.48117	3.7003	4.00861	COX7A1	Homo sapiens cytochrome c oxidase subunit VIIa polypeptide 1 (muscle) (COX7A1), mRNA.
ILMN_4226	8.35161	3.50576	4.76105	3.58016	4.22836	FBN1	Homo sapiens fibrillin 1 (Marfan syndrome) (FBN1), mRNA.
ILMN_7282	8.40679	3.8429	3.57059	4.7688	4.28232	CTHRC1	Homo sapiens collagen triple helix repeat containing 1 (CTHRC1), mRNA.
ILMN_9091	8.46316	3.80149	3.60265	4.76216	4.63387	MASP1	Homo sapiens mannan-binding lectin serine peptidase 1 (C4/C2 activating component of Ra-reactive factor) (MASP1), transcript variant 1, mRNA.
ILMN_13863	8.49959	4.26304	4.20488	4.64254	4.87673	IFI6	Homo sapiens interferon, alpha-inducible protein 6 (IFI6), transcript variant 2, mRNA.
ILMN_5106	8.04888	3.27208	3.6889	3.37762	4.97484	ANGPT1	Homo sapiens angiopoietin 1 (ANGPT1), mRNA.
ILMN_7672	8.8367	3.8493	3.50079	5.09688	3.98266	ZNF25	Homo sapiens zinc finger protein 25 (ZNF25), mRNA.
ILMN_6273	8.72951	4.50851	4.0613	5.25137	3.66245	MGLL	Homo sapiens monoglyceride lipase (MGLL), transcript variant 1, mRNA.
ILMN_15732	9.52344	4.2155	3.05925	6.02366	4.51167	COL15A1	Homo sapiens collagen, type XV, alpha 1 (COL15A1), mRNA.
ILMN_177898	10.7506	3.26867	2.0941	4.10395	3.29896	ALDH1A1	Homo sapiens aldehyde dehydrogenase 1 family, member A1 (ALDH1A1), mRNA.
ILMN_1132	10.0687	4.37539	3.78444	4.20257	3.62726	FLJ43339	Homo sapiens chromosome 15 open reading frame 52 (C15orf52), mRNA.
ILMN_26003	9.7514	4.11761	4.13411	3.8582	3.4669	P8	Homo sapiens p8 protein (candidate of metastasis 1) (P8), mRNA.
ILMN_25235	9.91715	4.8312	4.08602	3.34426	2.89521	VGLL3	Homo sapiens vestigial like 3 (Drosophila) (VGLL3), mRNA.
ILMN_14995	11.0654	3.65211	4.19216	3.58263	2.68009	FAP	Homo sapiens fibroblast activation protein, alpha (FAP), mRNA.
ILMN_26717	10.2851	3.64729	3.39046	2.91556	3.05143	HSPB3	Homo sapiens heat shock 27kDa protein 3 (HSPB3), mRNA.
ILMN_6223	10.1814	4.01947	4.39115	3.2387	0.461738	NFIX	Homo sapiens nuclear factor I/X (CCAAT-binding transcription factor) (NFIX), mRNA.
ILMN_18797	9.2012	2.6629	4.24358	2.62248	0	TMEM173	Homo sapiens transmembrane protein 173 (TMEM173), mRNA.
ILMN_17742	10.5627	3.2219	1.67276	4.58101	0	PSG9	Homo sapiens pregnancy specific beta-1-glycoprotein 9 (PSG9), mRNA.
ILMN_10606	13.0164	0.552343	2.84953	4.40095	4.08366	KIAA1199	Homo sapiens KIAA1199 (KIAA1199), mRNA.
ILMN_14466	7.4068	1.64064	3.47253	0.884616	0.849135	SERPINB2	Homo sapiens serpin peptidase inhibitor, clade B (ovalbumin), member 2 (SERPINB2), mRNA.
ILMN_4558	7.22243	1.38973	2.69065	1.62757	1.52198	OLFM4	Homo sapiens olfactomedin 4 (OLFM4), mRNA.
ILMN_28881	6.27158	1.42991	2.31244	1.27646	0.444347	CORIN	Homo sapiens corin, serine peptidase (CORIN), mRNA.
ILMN_15049	5.96456	1.30301	3.71907	0.597565	2.01645	COMP	Homo sapiens cartilage oligomeric matrix protein (COMP), mRNA.
ILMN_167872	7.16101	2.9621	2.98609	2.98925	0.175821	SLC22A4	Homo sapiens solute carrier family 22 (organic cation transporter), member 4 (SLC22A4), mRNA.
ILMN_21422	6.17851	2.62339	2.3449	2.90539	0.0141367	PSG5	Homo sapiens pregnancy specific beta-1-glycoprotein 5 (PSG5), mRNA.
ILMN_138818	7.54359	1.28302	2.45333	2.10876	3.00636	HOXA10	Homo sapiens homeo box A10 (HOXA10), transcript variant 2, mRNA.
ILMN_2804	7.58408	0	2.35215	3.36738	3.49531	GSTM3	Homo sapiens glutathione S-transferase M3 (brain) (GSTM3), mRNA.
ILMN_1300	7.22406	1.09177	3.84889	3.55564	2.56413	MMP3	Homo sapiens matrix metallopeptidase 3 (stromelysin 1, progelatinase) (MMP3), mRNA.
ILMN_975	6.01055	0	2.5105	1.79788	2.7363	PDE7B	Homo sapiens phosphodiesterase 7B (PDE7B), mRNA.
ILMN_16905	6.19744	0.995505	2.8118	1.89412	2.51009	COL5A3	Homo sapiens collagen, type V, alpha 3 (COL5A3), mRNA.
ILMN_27745	6.15891	0	2.52729	2.63749	1.95287	IRX5	Homo sapiens iroquois homeobox protein 5 (IRX5), mRNA.
ILMN_18326	6.0178	0	2.72427	2.27698	2.1114	GALNT5	Homo sapiens UDP-N-acetyl-alpha-D-galactosamine:polypeptide N-acetylgalactosaminyltransferase 5 (GalNAc-T5) (GALNT5), mRNA.
ILMN_19248	6.66274	0	1.94133	3.06845	2.5387	PTGDS	Homo sapiens prostaglandin D2 synthase 21kDa (brain) (PTGDS), mRNA.
ILMN_2381	7.3315	1.41647	3.36279	2.50007	2.2727	FOLR3	Homo sapiens folate receptor 3 (gamma) (FOLR3), mRNA.
ILMN_19388	7.03424	1.92335	3.27243	2.42055	1.87872	CPA3	Homo sapiens carboxypeptidase A3 (mast cell) (CPA3), mRNA.
ILMN_27934	6.77138	1.58833	3.34588	2.95313	1.85983	EBF	Homo sapiens early B-cell factor 1 (EBF1), mRNA.
ILMN_23209	7.16969	1.81597	2.69053	2.95357	2.34596	DPT	Homo sapiens dermatopontin (DPT), mRNA.
ILMN_9850	7.18387	2.20984	3.20087	2.96781	1.59851	SGCD	Homo sapiens sarcoglycan, delta (35kDa dystrophin-associated glycoprotein) (SGCD), transcript variant 1, mRNA.
ILMN_7238	6.95017	1.96183	2.56511	2.04894	2.36568	POSTN	Homo sapiens periostin, osteoblast specific factor (POSTN), mRNA.
ILMN_2517	6.37253	2.2964	2.22408	2.04233	1.7891	SLFN11	Homo sapiens schlafen family member 11 (SLFN11), mRNA.
ILMN_8827	8.2954	0	1.37881	1.40183	2.56965	KRTAP1-1	Homo sapiens keratin associated protein 1-1 (KRTAP1-1), mRNA.
ILMN_26146	7.48589	0	1.11487	1.54284	3.50725	ADCY4	Homo sapiens adenylate cyclase 4 (ADCY4), mRNA.
ILMN_11175	7.48497	1.09247	2.30686	0.481004	2.42915	XAF1	Homo sapiens XIAP associated factor-1 (XAF1), transcript variant 2, mRNA.
ILMN_22067	9.04056	0	1.8318	2.86235	3.49167	UBE1L	Homo sapiens ubiquitin-activating enzyme E1-like (UBE1L), mRNA.
ILMN_26396	8.76455	2.88625	3.19299	0	1.3367	KRTHA4	Homo sapiens keratin 34 (KRT34), mRNA.
ILMN_1287	8.69061	1.95628	2.06142	2.55249	1.86579	CLEC3B	Homo sapiens C-type lectin domain family 3, member B (CLEC3B), mRNA.
ILMN_17677	8.41638	2.86008	2.85781	3.19975	1.27124	SAMD9	Homo sapiens sterile alpha motif domain containing 9 (SAMD9), mRNA.
ILMN_19014	7.73163	1.83265	1.03854	1.46267	0	HSD17B2	Homo sapiens hydroxysteroid (17-beta) dehydrogenase 2 (HSD17B2), mRNA.
ILMN_174163	10.2968	3.00308	2.68411	2.59198	0.97985	C10ORF54	Homo sapiens chromosome 10 open reading frame 54 (C10orf54), mRNA.
ILMN_8119	8.93433	2.38336	1.64675	1.38057	2.18834	ADH1A	Homo sapiens alcohol dehydrogenase 1A (class I), alpha polypeptide (ADH1A), mRNA.
ILMN_22081	7.41067	3.06356	1.13956	2.27186	2.34165	ADAMTS5	Homo sapiens ADAM metallopeptidase with thrombospondin type 1 motif, 5 (aggrecanase-2) (ADAMTS5), mRNA.
ILMN_10108	7.40201	2.84142	1.67822	3.05949	2.06349	MR1	Homo sapiens major histocompatibility complex, class I-related (MR1), mRNA.
ILMN_10961	6.95865	2.04001	0.298814	3.57887	3.13867	ABI3BP	Homo sapiens ABI gene family, member 3 (NESH) binding protein (ABI3BP), mRNA.
ILMN_19002	7.33121	0	0.124499	1.00403	3.01554	DPYD	Homo sapiens dihydropyrimidine dehydrogenase (DPYD), mRNA.
ILMN_13301	5.71542	0	1.49242	0.356233	2.60498	HCFC2	Homo sapiens host cell factor C2 (HCFC2), mRNA.
ILMN_24461	6.00897	1.99672	1.63586	0	1.90845	ELA2	Homo sapiens elastase 2, neutrophil (ELA2), mRNA.
ILMN_36330	5.92352	1.34554	2.51283	0	2.32094	KIAA1912	PREDICTED: Homo sapiens KIAA1912 protein (KIAA1912), mRNA.
ILMN_20482	6.9897	2.44526	2.24243	0.0557496	2.72991	TCF8	Homo sapiens zinc finger E-box binding homeobox 1 (ZEB1), mRNA.
ILMN_7200	6.47522	0.990036	2.92791	0.87288	2.47751	NR2F1	Homo sapiens nuclear receptor subfamily 2, group F, member 1 (NR2F1), mRNA.
ILMN_18788	6.01535	1.57845	2.245	1.02184	3.11112	TBX2	Homo sapiens T-box 2 (TBX2), mRNA.
ILMN_3561	5.41727	0	0	1.8497	0	PDCD1LG2	Homo sapiens programmed cell death 1 ligand 2 (PDCD1LG2), mRNA.
ILMN_7663	4.54963	0	1.8419	0	0	CDH18	Homo sapiens cadherin 18, type 2 (CDH18), mRNA.
ILMN_26019	6.4949	0	1.0779	0	1.1291	TM4SF20	Homo sapiens transmembrane 4 L six family member 20 (TM4SF20), mRNA.
ILMN_179125	5.47857	0	0	0.207943	1.16219	ZNF536	Homo sapiens zinc finger protein 536 (ZNF536), mRNA.
ILMN_27133	6.28204	1.13004	0.30256	0	0	SAMD9L	Homo sapiens sterile alpha motif domain containing 9-like (SAMD9L), mRNA.
ILMN_29679	10.4033	4.76073	4.29065	4.7934	5.22087	NTN4	Homo sapiens netrin 4 (NTN4), mRNA.
ILMN_2725	9.62596	5.25649	4.3372	4.73476	5.99381	IFI16	Homo sapiens interferon, gamma-inducible protein 16 (IFI16), mRNA.
ILMN_22149	9.64928	3.87793	4.38288	6.06022	6.20779	FLJ21986	Homo sapiens hypothetical protein FLJ21986 (FLJ21986), mRNA.
ILMN_177586	8.61402	3.44782	4.14089	4.76629	5.51321	GRK5	Homo sapiens G protein-coupled receptor kinase 5 (GRK5), mRNA.
ILMN_27218	8.72553	3.48484	3.87507	5.27108	5.88096	TCEA3	Homo sapiens transcription elongation factor A (SII), 3 (TCEA3), mRNA.
ILMN_10535	9.50027	3.60884	4.01823	4.46294	4.97594	PLSCR4	Homo sapiens phospholipid scramblase 4 (PLSCR4), mRNA.
ILMN_17216	9.46352	5.13433	4.45677	4.49928	4.3663	RSNL2	Homo sapiens CAP-GLY domain containing linker protein family, member 4 (CLIP4), mRNA.
ILMN_7551	9.5221	4.68855	4.73382	4.59121	4.75791	OSAP	Homo sapiens ovary-specific acidic protein (OSAP), mRNA.
ILMN_23954	9.42685	5.02452	4.61388	5.1913	4.72436	MSRB3	Homo sapiens methionine sulfoxide reductase B3 (MSRB3), transcript variant 1, mRNA.
ILMN_22189	9.30733	5.39607	5.05703	5.35585	4.9719	TGFBR2	Homo sapiens transforming growth factor, beta receptor II (70/80kDa) (TGFBR2), transcript variant 1, mRNA.
ILMN_17802	10.4139	5.78633	5.46267	5.42378	4.45022	COL12A1	Homo sapiens collagen, type XII, alpha 1 (COL12A1), transcript variant long, mRNA.
ILMN_6827	10.1434	5.75579	5.48366	5.57951	4.39964	CRYAB	Homo sapiens crystallin, alpha B (CRYAB), mRNA.
ILMN_8120	9.72901	4.9845	5.29381	5.17029	3.90605	ABCC3	Homo sapiens ATP-binding cassette, sub-family C (CFTR/MRP), member 3 (ABCC3), transcript variant MRP3A, mRNA.
ILMN_171287	10.284	4.45956	4.49022	4.67499	4.40867	NUPR1	Homo sapiens nuclear protein 1 (NUPR1), transcript variant 1, mRNA.
ILMN_25195	10.0798	4.5143	4.86024	4.81746	4.06244	LY96	Homo sapiens lymphocyte antigen 96 (LY96), mRNA.
ILMN_29321	10.5614	4.6182	4.94476	4.60055	4.58204	C1S	Homo sapiens complement component 1, s subcomponent (C1S), transcript variant 1, mRNA.
ILMN_28123	9.88083	4.73393	4.71413	4.37268	3.81623	IFIT2	Homo sapiens interferon-induced protein with tetratricopeptide repeats 2 (IFIT2), mRNA.
ILMN_9847	9.65001	4.13855	5.26539	4.21768	4.72368	PRRX1	Homo sapiens paired related homeobox 1 (PRRX1), transcript variant pmx-1a, mRNA.
ILMN_21403	8.97676	5.48983	4.57195	5.6158	3.12938	CPA4	Homo sapiens carboxypeptidase A4 (CPA4), mRNA.
ILMN_20864	9.4816	5.81705	5.32042	5.96249	3.85637	FLJ13391	Homo sapiens transmembrane protein 166 (TMEM166), mRNA.
ILMN_7967	10.1423	6.28754	3.98755	6.79477	2.77138	PSG4	Homo sapiens pregnancy specific beta-1-glycoprotein 4 (PSG4), transcript variant 1, mRNA.
ILMN_28982	12.4901	4.95398	4.64674	5.89833	5.06402	SULF1	Homo sapiens sulfatase 1 (SULF1), mRNA.
ILMN_4649	12.4319	4.48163	5.68101	5.0934	5.64443	CYBRD1	Homo sapiens cytochrome b reductase 1 (CYBRD1), mRNA.
ILMN_16923	11.2681	5.25298	5.21567	4.79191	5.19433	CTSK	Homo sapiens cathepsin K (CTSK), mRNA.
ILMN_29187	11.0542	5.27922	5.26749	5.49637	4.97797	FBLN5	Homo sapiens fibulin 5 (FBLN5), mRNA.
ILMN_4487	11.3414	4.5145	4.48849	4.99883	6.00149	PPP1R3C	Homo sapiens protein phosphatase 1, regulatory (inhibitor) subunit 3C (PPP1R3C), mRNA.
ILMN_6495	12.0996	5.23232	4.52605	3.91055	4.73502	TNFRSF11B	Homo sapiens tumor necrosis factor receptor superfamily, member 11b (osteoprotegerin) (TNFRSF11B), mRNA.
ILMN_28316	11.2812	3.46977	3.63694	4.56097	4.05747	PODN	Homo sapiens podocan (PODN), mRNA.
ILMN_19834	11.2614	4.14276	3.58919	4.4048	4.50556	C1R	Homo sapiens complement component 1, r subcomponent (C1R), mRNA.
ILMN_30233	11.2028	3.20336	4.1958	5.63587	4.52079	TMEM119	Homo sapiens transmembrane protein 119 (TMEM119), mRNA.
ILMN_9853	10.9133	8.46153	8.39029	3.13137	3.00046	MEG3	Homo sapiens maternally expressed 3 (MEG3) on chromosome 14. XR_001346-XR_001372
ILMN_27567	10.5173	6.22062	5.85119	6.21779	5.24598	EDG2	Homo sapiens endothelial differentiation, lysophosphatidic acid G-protein-coupled receptor, 2 (EDG2), transcript variant 1, mRNA.
ILMN_1751	10.2072	6.29274	6.09142	6.11394	4.75806	IFIT1	Homo sapiens interferon-induced protein with tetratricopeptide repeats 1 (IFIT1), transcript variant 2, mRNA.
ILMN_20496	9.55674	6.24686	5.36645	5.38084	5.23042	COL8A1	Homo sapiens collagen, type VIII, alpha 1 (COL8A1), transcript variant 1, mRNA.
ILMN_10588	9.84798	5.20161	5.01469	5.68132	5.636	CRIM1	Homo sapiens cysteine rich transmembrane BMP regulator 1 (chordin-like) (CRIM1), mRNA.
ILMN_18878	10.093	5.53495	5.21972	6.04442	5.94898	NTF3	Homo sapiens neurotrophin 3 (NTF3), mRNA.
ILMN_4297	9.72867	4.74391	4.70221	6.46256	5.96398	VEGFC	Homo sapiens vascular endothelial growth factor C (VEGFC), mRNA.
ILMN_26097	10.6441	6.10659	6.12177	6.65178	6.5619	IL10RB	Homo sapiens interleukin 10 receptor, beta (IL10RB), mRNA.
ILMN_13963	10.4452	5.55006	6.25107	7.04602	5.99736	AKR1C2	Homo sapiens aldo-keto reductase family 1, member C2 (dihydrodiol dehydrogenase 2; bile acid binding protein; 3-alpha hydroxysteroid dehydrogenase, type III) (AKR1C2), transcript variant 1, mRNA. XM_943424 XM_943425 XM_943427
ILMN_5763	10.1962	6.47571	5.24368	6.29547	6.35427	GNG12	Homo sapiens guanine nucleotide binding protein (G protein), gamma 12 (GNG12), mRNA.
ILMN_2921	10.6873	6.02698	5.66117	6.21094	5.73206	COL16A1	Homo sapiens collagen, type XVI, alpha 1 (COL16A1), mRNA.
ILMN_22529	10.783	6.17736	5.64675	6.29331	5.97174	NNMT	Homo sapiens nicotinamide N-methyltransferase (NNMT), mRNA.
ILMN_177018	10.6478	5.55797	5.65484	6.04882	6.29061	ENPP2	Homo sapiens ectonucleotide pyrophosphatase/phosphodiesterase 2 (autotaxin) (ENPP2), transcript variant 2, mRNA.
ILMN_14614	10.2011	5.46655	6.26612	6.08335	5.83208	CYP1B1	Homo sapiens cytochrome P450, family 1, subfamily B, polypeptide 1 (CYP1B1), mRNA.
ILMN_13883	9.98778	5.70634	5.7605	6.068	5.65572	MOXD1	Homo sapiens monooxygenase, DBH-like 1 (MOXD1), transcript variant 1, mRNA.
ILMN_27948	10.4208	6.38288	6.38514	5.96186	6.42611	GLT8D2	Homo sapiens glycosyltransferase 8 domain containing 2 (GLT8D2), mRNA.
ILMN_179703	11.7932	6.63629	6.18619	7.47552	7.00285	SVEP1	Homo sapiens sushi, von Willebrand factor type A, EGF and pentraxin domain containing 1 (SVEP1), mRNA.
ILMN_26679	11.7838	7.15735	6.67194	7.14619	6.72097	ANGPTL2	Homo sapiens angiopoietin-like 2 (ANGPTL2), mRNA.
ILMN_162394	11.1794	6.75487	6.10616	7.09008	7.43251	DAB2	Homo sapiens disabled homolog 2, mitogen-responsive phosphoprotein (Drosophila) (DAB2), mRNA.
ILMN_14624	12.095	6.25535	5.72591	6.13095	6.63293	WNT5A	Homo sapiens wingless-type MMTV integration site family, member 5A (WNT5A), mRNA.
ILMN_165232	10.7743	5.85291	5.2262	6.37088	7.40384	PDGFRA	Homo sapiens platelet-derived growth factor receptor, alpha polypeptide (PDGFRA), mRNA.
ILMN_28370	10.5885	6.05489	6.36277	6.08591	7.47019	IRXL1	Homo sapiens mohawk homeobox (MKX), mRNA.
ILMN_9214	11.5542	6.61397	6.26971	7.1599	6.06728	LOXL4	Homo sapiens lysyl oxidase-like 4 (LOXL4), mRNA.
ILMN_21517	10.8443	6.95521	6.4065	7.65905	6.00347	PAPPA	Homo sapiens pregnancy-associated plasma protein A, pappalysin 1 (PAPPA), mRNA.
ILMN_14549	11.6432	7.3358	6.35992	6.98126	5.77277	RGC32	Homo sapiens response gene to complement 32 (RGC32), mRNA.
ILMN_7313	11.2713	7.43655	6.06463	6.9065	5.8775	OXTR	Homo sapiens oxytocin receptor (OXTR), mRNA.
ILMN_9057	9.56979	4.19722	3.78393	5.26432	8.28673	TXNIP	Homo sapiens thioredoxin interacting protein (TXNIP), mRNA.
ILMN_138662	12.2034	7.68796	6.96037	7.79621	7.45982	EFEMP1	Homo sapiens EGF-containing fibulin-like extracellular matrix protein 1 (EFEMP1), transcript variant 1, mRNA.
ILMN_6000	11.6616	8.32253	7.78714	7.78367	6.69013	CD44	Homo sapiens CD44 antigen (Indian blood group) (CD44), transcript variant 1, mRNA.
ILMN_11789	11.8938	7.37633	6.83341	7.86915	8.18624	CDH11	Homo sapiens cadherin 11, type 2, OB-cadherin (osteoblast) (CDH11), mRNA.
ILMN_30352	12.1777	8.00001	7.36851	8.08601	8.36992	HAK	Homo sapiens heart alpha-kinase (HAK), mRNA.
ILMN_6004	12.0011	7.5255	7.37084	6.80716	8.45846	CXCL12	Homo sapiens chemokine (C-X-C motif) ligand 12 (stromal cell-derived factor 1) (CXCL12), transcript variant 3, mRNA.
ILMN_27030	11.5424	8.35992	7.20191	5.86558	7.21118	FOS	Homo sapiens v-fos FBJ murine osteosarcoma viral oncogene homolog (FOS), mRNA.
ILMN_136935	12.0072	7.42027	7.59218	7.49302	6.4183	SPOCK	Homo sapiens sparc/osteonectin, cwcv and kazal-like domains proteoglycan (testican) (SPOCK), mRNA.
ILMN_17477	12.0052	8.29062	6.9437	7.79947	6.00377	ARID5B	Homo sapiens AT rich interactive domain 5B (MRF1-like) (ARID5B), mRNA.
ILMN_16098	13.381	8.0986	7.72905	6.69791	6.91979	THBS2	Homo sapiens thrombospondin 2 (THBS2), mRNA.
ILMN_29913	13.6849	6.02122	5.01318	7.00802	5.84932	DCN	Homo sapiens decorin (DCN), transcript variant C, mRNA.
ILMN_8896	14.0536	8.59294	8.14764	8.5652	7.41154	S100A4	Homo sapiens S100 calcium binding protein A4 (S100A4), transcript variant 1, mRNA.
ILMN_25766	13.0912	8.56478	7.53074	8.79309	8.33769	CD248	Homo sapiens CD248 molecule, endosialin (CD248), mRNA.
ILMN_4882	13.6873	10.1935	9.17529	9.62576	7.25216	THBS1	Homo sapiens thrombospondin 1 (THBS1), mRNA.
ILMN_168089	14.1983	8.72027	8.69385	9.97372	9.47169	IGFBP5	Homo sapiens insulin-like growth factor binding protein 5 (IGFBP5), mRNA.
ILMN_23060	13.732	9.68179	8.83984	9.81828	9.48692	COL1A2	Homo sapiens collagen, type I, alpha 2 (COL1A2), mRNA.
ILMN_22617	2.38578	11.4167	11.5721	10.7899	10.7343	KIF1A	Homo sapiens kinesin family member 1A (KIF1A), mRNA.
ILMN_28887	2.40749	11.409	11.6508	11.2372	11.3089	ZIC2	Homo sapiens Zic family member 2 (odd-paired homolog, Drosophila) (ZIC2), mRNA.
ILMN_29401	1.97274	12.1719	11.8461	11.7756	11.0495	CDH1	Homo sapiens cadherin 1, type 1, E-cadherin (epithelial) (CDH1), mRNA.
ILMN_137475	1.81994	11.8457	11.7199	11.8988	11.3053	CNTNAP2	Homo sapiens contactin associated protein-like 2 (CNTNAP2), mRNA.
ILMN_12242	2.10586	11.823	11.8018	11.7134	12.0224	DPPA4	Homo sapiens developmental pluripotency associated 4 (DPPA4), mRNA.
ILMN_6057	1.33916	12.1492	12.4768	12.2528	12.3817	LIN28	Homo sapiens lin-28 homolog (C. elegans) (LIN28), mRNA.
ILMN_137045	3.30691	12.0608	12.485	12.0368	12.2828	GAL	Homo sapiens galanin (GAL), mRNA.
ILMN_28051	2.93501	12.2794	12.0854	12.205	11.3593	ACTA1	Homo sapiens actin, alpha 1, skeletal muscle (ACTA1), mRNA.
ILMN_29799	3.26135	11.9822	10.9723	12.5288	11.9305	HAND1	Homo sapiens heart and neural crest derivatives expressed 1 (HAND1), mRNA.
ILMN_18538	2.99026	11.9653	10.9555	13.1187	11.8814	H19	Homo sapiens H19, imprinted maternally expressed untranslated mRNA (H19) on chromosome 11.
ILMN_23395	0.0415556	11.7707	11.3483	11.5675	11.0267	GLDC	Homo sapiens glycine dehydrogenase (decarboxylating; glycine decarboxylase, glycine cleavage system protein P) (GLDC), mRNA.
ILMN_21827	0	11.6412	11.6434	11.6205	11.424	PROM1	Homo sapiens prominin 1 (PROM1), mRNA.
ILMN_14960	0	11.9267	11.5812	11.1541	11.5878	ZNF206	Homo sapiens zinc finger and SCAN domain containing 10 (ZSCAN10), mRNA.
ILMN_9806	0	12.106	11.8985	11.467	11.2781	RAB17	Homo sapiens RAB17, member RAS oncogene family (RAB17), mRNA.
ILMN_27111	0	12.2448	12.0585	11.8157	11.6106	POU5F1	Homo sapiens POU domain, class 5, transcription factor 1 (POU5F1), transcript variant 1, mRNA.
ILMN_14210	0	10.3871	10.1424	10.446	10.9178	PRSS8	Homo sapiens protease, serine, 8 (prostasin) (PRSS8), mRNA.
ILMN_16897	0	10.5097	10.3061	10.1121	11.0258	LIN28B	Homo sapiens lin-28 homolog B (C. elegans) (LIN28B), mRNA.
ILMN_15795	0	9.92686	10.2972	10.2832	11.5735	KCNK12	Homo sapiens potassium channel, subfamily K, member 12 (KCNK12), mRNA.
ILMN_14080	0	9.61749	10.5058	11.0747	10.9354	CST1	Homo sapiens cystatin SN (CST1), mRNA.
ILMN_18646	0	11.2782	10.8996	11.0384	10.1089	POU5F1P1	Homo sapiens POU class 5 homeobox 1 pseudogene 1 (POU5F1P1) on chromosome 8.
ILMN_137508	0	10.5087	11.0547	11.3497	10.6592	NPPB	Homo sapiens natriuretic peptide precursor B (NPPB), mRNA.
ILMN_25300	1.02532	10.1251	10.7658	10.0595	9.86492	SLC7A3	Homo sapiens solute carrier family 7 (cationic amino acid transporter, y+ system), member 3 (SLC7A3), mRNA.
ILMN_28547	1.0391	10.505	10.0689	10.7337	10.4864	LCP1	Homo sapiens lymphocyte cytosolic protein 1 (L-plastin) (LCP1), mRNA.
ILMN_178034	1.81451	10.609	10.4394	9.97464	10.1654	MYCN	Homo sapiens v-myc myelocytomatosis viral related oncogene, neuroblastoma derived (avian) (MYCN), mRNA.
ILMN_24120	1.9285	11.0213	10.9848	10.6231	10.57	PODXL	Homo sapiens podocalyxin-like (PODXL), transcript variant 1, mRNA.
ILMN_26680	0	10.2713	10.0825	9.48842	10.0104	RPRM	Homo sapiens reprimo, TP53 dependent G2 arrest mediator candidate (RPRM), mRNA.
ILMN_136941	0	10.1466	9.99396	9.54949	10.1982	CAMKV	Homo sapiens CaM kinase-like vesicle-associated (CAMKV), mRNA.
ILMN_23984	0	10.5371	10.0146	9.84518	10.0609	CXADR	Homo sapiens coxsackie virus and adenovirus receptor (CXADR), mRNA.
ILMN_22926	0	10.1972	10.2373	10.1587	9.71389	CGN	Homo sapiens cingulin (CGN), mRNA.
ILMN_26326	0	10.4665	10.4144	9.9601	9.61956	EPHA1	Homo sapiens EPH receptor A1 (EPHA1), mRNA.
ILMN_7165	0	11.1476	10.3327	9.9242	9.63847	NODAL	Homo sapiens nodal homolog (mouse) (NODAL), mRNA.
ILMN_23074	1.9738	8.91496	9.85313	9.95651	11.9697	MT1H	Homo sapiens metallothionein 1H (MT1H), mRNA.
ILMN_171554	2.66576	9.9717	9.75291	9.81031	10.3226	SOX2	Homo sapiens SRY (sex determining region Y)-box 2 (SOX2), mRNA.
ILMN_9299	2.12063	9.75203	9.86496	9.65501	9.8193	D4S234E	Homo sapiens DNA segment on chromosome 4 (unique) 234 expressed sequence (D4S234E), mRNA.
ILMN_167649	3.18479	9.13077	9.77308	9.2264	9.82201	KIF5C	Homo sapiens kinesin family member 5C (KIF5C), mRNA.
ILMN_14229	3.15946	9.36491	8.62172	9.5711	10.3186	SLCO2A1	Homo sapiens solute carrier organic anion transporter family, member 2A1 (SLCO2A1), mRNA.
ILMN_24301	1.78178	10.3452	10.2678	9.60883	9.43863	FLJ25801	Homo sapiens hypothetical protein FLJ25801 (FLJ25801), mRNA.
ILMN_14238	1.49834	10.3441	10.2916	10.0124	9.34666	LOC138255	Homo sapiens chromosome 9 open reading frame 135 (C9orf135), mRNA.
ILMN_4891	1.69309	9.77978	10.0574	9.54294	8.85326	ITGB1BP3	Homo sapiens integrin beta 1 binding protein 3 (ITGB1BP3), transcript variant 1, mRNA.
ILMN_8635	1.68423	7.04464	7.05857	7.95158	9.76645	WDR72	Homo sapiens WD repeat domain 72 (WDR72), mRNA.
ILMN_23504	2.2192	7.95004	7.57762	9.1523	10.6394	APOA1	Homo sapiens apolipoprotein A-I (APOA1), mRNA.
ILMN_28136	0	9.61111	9.54624	11.0473	7.67785	MMP9	Homo sapiens matrix metallopeptidase 9 (gelatinase B, 92kDa gelatinase, 92kDa type IV collagenase) (MMP9), mRNA.
ILMN_138686	2.28434	8.97709	8.58255	8.72385	8.91805	BMP2	Homo sapiens bone morphogenetic protein 2 (BMP2), mRNA.
ILMN_15758	1.82056	8.95365	8.68256	8.74274	9.41364	DNMT3B	Homo sapiens DNA (cytosine-5-)-methyltransferase 3 beta (DNMT3B), transcript variant 6, mRNA.
ILMN_19524	2.39736	8.91983	8.58927	8.84131	9.6459	ECAT11	Homo sapiens LINE-1 type transposase domain containing 1 (L1TD1), mRNA.
ILMN_9800	2.38484	8.09004	8.42874	8.54907	8.726	KIAA1324L	Homo sapiens KIAA1324-like (KIAA1324L), mRNA.
ILMN_22815	2.12393	8.41516	7.86851	8.19487	9.3725	GDF3	Homo sapiens growth differentiation factor 3 (GDF3), mRNA.
ILMN_13065	1.3056	8.44623	8.79084	10.0886	9.3364	DLK1	Homo sapiens delta-like 1 homolog (Drosophila) (DLK1), mRNA.
ILMN_17074	1.48568	9.35874	9.52673	9.6091	9.57794	OVOL2	Homo sapiens ovo-like 2 (Drosophila) (OVOL2), mRNA.
ILMN_3993	0	9.44931	9.39455	8.90188	9.64769	ZIC3	Homo sapiens Zic family member 3 heterotaxy 1 (odd-paired homolog, Drosophila) (ZIC3), mRNA.
ILMN_23727	0	9.44797	9.46385	9.07512	9.52732	MAL2	Homo sapiens mal, T-cell differentiation protein 2 (MAL2), mRNA.
ILMN_22171	0	9.41329	9.13398	8.85652	9.75507	FOXA3	Homo sapiens forkhead box A3 (FOXA3), mRNA.
ILMN_19998	0	10.0631	9.02915	8.47796	9.53601	EOMES	Homo sapiens eomesodermin homolog (Xenopus laevis) (EOMES), mRNA.
ILMN_18424	0	10.2206	9.69291	9.06588	10.3854	SALL4	Homo sapiens sal-like 4 (Drosophila) (SALL4), mRNA.
ILMN_28975	0	8.76975	9.19904	9.48591	9.58822	NMU	Homo sapiens neuromedin U (NMU), mRNA.
ILMN_10499	0	9.17737	9.17204	9.09774	10.2369	HEY2	Homo sapiens hairy/enhancer-of-split related with YRPW motif 2 (HEY2), mRNA.
ILMN_29181	0	8.52191	8.32337	7.86988	10.4774	LEFTY2	Homo sapiens left-right determination factor 2 (LEFTY2), mRNA.
ILMN_17486	0	9.75161	9.90663	9.35764	8.30746	PRODH	Homo sapiens proline dehydrogenase (oxidase) 1 (PRODH), nuclear gene encoding mitochondrial protein, mRNA.
ILMN_13460	0	9.89337	9.97099	9.7331	8.81876	VANGL2	Homo sapiens vang-like 2 (van gogh, Drosophila) (VANGL2), mRNA.
ILMN_21408	0	9.743	9.54085	9.1987	8.99816	C1ORF106	Homo sapiens chromosome 1 open reading frame 106 (C1orf106), mRNA.
ILMN_24054	0.0187951	9.99462	9.8183	9.35863	9.03789	COBL	Homo sapiens cordon-bleu homolog (mouse) (COBL), mRNA.
ILMN_137773	0.822242	10.0492	10.1937	9.22459	8.83395	CYP2S1	Homo sapiens cytochrome P450, family 2, subfamily S, polypeptide 1 (CYP2S1), mRNA.
ILMN_12616	0.485808	10.2533	10.0081	9.5836	8.96501	LRRN1	Homo sapiens leucine rich repeat neuronal 1 (LRRN1), mRNA.
ILMN_16823	0	10.2977	9.87629	9.28698	7.65919	SOX3	Homo sapiens SRY (sex determining region Y)-box 3 (SOX3), mRNA.
ILMN_176938	0	9.09256	8.8546	8.31169	8.13418	GRPR	Homo sapiens gastrin-releasing peptide receptor (GRPR), mRNA.
ILMN_5660	0	9.18262	8.6772	8.4846	8.30264	CHST4	Homo sapiens carbohydrate (N-acetylglucosamine 6-O) sulfotransferase 4 (CHST4), mRNA.
ILMN_137432	0	9.3419	8.74509	8.39668	7.97043	ZFP42	Homo sapiens zinc finger protein 42 (ZFP42), mRNA.
ILMN_9512	0	9.12756	9.1888	8.54305	8.42451	SILV	Homo sapiens silver homolog (mouse) (SILV), mRNA.
ILMN_17051	0.232248	9.30284	9.36272	8.97617	7.81466	SH3GL3	Homo sapiens SH3-domain GRB2-like 3 (SH3GL3), mRNA.
ILMN_164020	0	8.80056	8.57076	8.86004	7.92679	IGSF3	Homo sapiens immunoglobulin superfamily, member 3 (IGSF3), transcript variant 1, mRNA.
ILMN_23021	0	8.66592	8.42831	8.91004	8.29797	NKD2	Homo sapiens naked cuticle homolog 2 (Drosophila) (NKD2), mRNA.
ILMN_13122	0	8.71856	8.58037	8.45118	8.01226	FGD5	Homo sapiens FYVE, RhoGEF and PH domain containing 5 (FGD5), mRNA.
ILMN_9082	0	8.92461	9.1747	7.98009	8.58532	TRIM71	Homo sapiens tripartite motif-containing 71 (TRIM71), mRNA.
ILMN_19746	0	9.38376	8.7032	8.48244	9.10154	LEFTY1	Homo sapiens left-right determination factor 1 (LEFTY1), mRNA.
ILMN_550	0.777867	8.73279	8.57236	8.34102	8.87356	GPM6B	Homo sapiens glycoprotein M6B (GPM6B), transcript variant 4, mRNA.
ILMN_26383	0.753403	9.03209	9.00563	8.30068	9.06787	NELL2	Homo sapiens NEL-like 2 (chicken) (NELL2), mRNA.
ILMN_9665	2.6	9.19991	8.5079	9.12273	8.25894	PKP2	Homo sapiens plakophilin 2 (PKP2), transcript variant 2a, mRNA.
ILMN_11468	2.58131	8.779	8.83409	9.17606	8.67542	RAB25	Homo sapiens RAB25, member RAS oncogene family (RAB25), mRNA.
ILMN_163593	2.26707	9.5076	9.45571	9.1698	8.45698	GARNL4	Homo sapiens GTPase activating Rap/RanGAP domain-like 4 (GARNL4), mRNA.
ILMN_19577	2.06922	8.48256	8.63767	8.51716	8.1674	CMTM8	Homo sapiens CKLF-like MARVEL transmembrane domain containing 8 (CMTM8), mRNA.
ILMN_29974	1.52478	8.50278	8.39633	8.31609	8.57522	FBN3	Homo sapiens fibrillin 3 (FBN3), mRNA.
ILMN_653	1.4033	9.26861	8.44953	9.13779	8.16891	DSG2	Homo sapiens desmoglein 2 (DSG2), mRNA.
ILMN_21836	1.71348	8.60704	8.05535	7.61106	7.58346	ORC1L	Homo sapiens origin recognition complex, subunit 1-like (yeast) (ORC1L), mRNA.
ILMN_3531	1.07593	8.59007	8.43219	7.68897	7.24745	TMSB4Y	Homo sapiens thymosin, beta 4, Y-linked (TMSB4Y), mRNA.
ILMN_26790	5.5121	11.5358	11.4422	11.8201	11.2821	VAMP8	Homo sapiens vesicle-associated membrane protein 8 (endobrevin) (VAMP8), mRNA.
ILMN_22286	4.8638	10.1015	10.9348	11.3755	12.635	MT1G	Homo sapiens metallothionein 1G (MT1G), mRNA.
ILMN_7453	4.17364	11.1977	10.8626	10.8917	11.0886	RASL11B	Homo sapiens RAS-like, family 11, member B (RASL11B), mRNA.
ILMN_5697	3.78577	10.3184	10.5009	10.2698	12.1594	SCNN1A	Homo sapiens sodium channel, nonvoltage-gated 1 alpha (SCNN1A), mRNA.
ILMN_11525	5.88115	12.9504	13.1335	13.0087	12.578	APOE	Homo sapiens apolipoprotein E (APOE), mRNA.
ILMN_28723	5.3057	13.3926	13.4686	13.4209	13.2461	CD24	Homo sapiens CD24 molecule (CD24), mRNA.
ILMN_24561	2.61876	10.6539	10.0078	10.6291	10.5548	PUNC	Homo sapiens putative neuronal cell adhesion molecule (PUNC), mRNA.
ILMN_9685	2.62654	11.0407	10.4246	10.9844	10.4721	KRT8	Homo sapiens keratin 8 (KRT8), mRNA.
ILMN_18670	2.71206	9.54851	10.1753	11.542	10.6125	APOA2	Homo sapiens apolipoprotein A-II (APOA2), mRNA.
ILMN_9112	2.54177	10.5269	10.3234	10.2408	8.98268	VGF	Homo sapiens VGF nerve growth factor inducible (VGF), mRNA.
ILMN_12740	2.41188	10.2357	10.4203	10.0719	9.4861	CDH3	Homo sapiens cadherin 3, type 1, P-cadherin (placental) (CDH3), mRNA.
ILMN_12152	3.15852	10.0439	10.2867	9.9235	9.42799	SOX15	Homo sapiens SRY (sex determining region Y)-box 15 (SOX15), mRNA.
ILMN_19539	4.7173	11.1693	10.6621	11.5622	9.61931	ACTC	Homo sapiens actin, alpha, cardiac muscle (ACTC), mRNA.
ILMN_9394	3.91101	11.6682	10.8554	11.0884	9.08724	SPP1	Homo sapiens secreted phosphoprotein 1 (osteopontin, bone sialoprotein I, early T-lymphocyte activation 1) (SPP1), transcript variant 2, mRNA.
ILMN_11289	3.84959	11.5604	11.6194	11.6398	10.0186	RBP1	Homo sapiens retinol binding protein 1, cellular (RBP1), mRNA.
ILMN_7137	4.02718	10.8456	10.5372	10.8942	10.0148	FAM84B	Homo sapiens family with sequence similarity 84, member B (FAM84B), mRNA.
ILMN_11696	3.63897	10.7516	10.8273	10.4861	10.1842	GPC4	Homo sapiens glypican 4 (GPC4), mRNA.
ILMN_22093	4.26345	10.3205	10.3827	10.0966	10.4976	HERC5	Homo sapiens hect domain and RLD 5 (HERC5), mRNA.
ILMN_23302	0	7.33039	7.42467	7.06661	6.31505	SPINT1	Homo sapiens serine peptidase inhibitor, Kunitz type 1 (SPINT1), transcript variant 1, mRNA.
ILMN_9180	0	7.06139	7.32	7.42318	6.49426	C19ORF33	Homo sapiens chromosome 19 open reading frame 33 (C19orf33), mRNA.
ILMN_26815	0.552885	7.64682	8.02761	7.26586	5.97961	PODXL2	Homo sapiens podocalyxin-like 2 (PODXL2), mRNA.
ILMN_2937	0.587571	7.86121	7.83513	7.49823	6.29878	HOMER2	Homo sapiens homer homolog 2 (Drosophila) (HOMER2), transcript variant 1, mRNA.
ILMN_137235	0	6.76196	7.00108	7.25436	5.55709	DLX5	Homo sapiens distal-less homeo box 5 (DLX5), mRNA.
ILMN_12805	0	6.88188	7.23441	6.22616	5.5512	RECQL4	Homo sapiens RecQ protein-like 4 (RECQL4), mRNA.
ILMN_24868	0	7.02935	7.03231	6.47847	5.58385	SLC25A21	Homo sapiens solute carrier family 25 (mitochondrial oxodicarboxylate carrier), member 21 (SLC25A21), mRNA.
ILMN_12014	0	7.18058	7.28193	6.09892	5.39462	B4GALNT4	Homo sapiens beta-1,4-N-acetyl-galactosaminyl transferase 4 (B4GALNT4), mRNA.
ILMN_1423	0	7.26509	7.21389	6.47014	5.92649	FGF8	Homo sapiens fibroblast growth factor 8 (androgen-induced) (FGF8), transcript variant E, mRNA.
ILMN_15614	0	7.19338	7.88305	6.58716	5.87838	TAC1	Homo sapiens tachykinin, precursor 1 (substance K, substance P, neurokinin 1, neurokinin 2, neuromedin L, neurokinin alpha, neuropeptide K, neuropeptide gamma) (TAC1), transcript variant alpha, mRNA.
ILMN_26025	0	6.28894	6.68321	6.02141	5.26716	PGBD5	Homo sapiens piggyBac transposable element derived 5 (PGBD5), mRNA.
ILMN_4788	0	6.40303	6.663	5.96351	5.25585	SYNGR3	Homo sapiens synaptogyrin 3 (SYNGR3), mRNA.
ILMN_18346	0	6.63906	6.29587	6.2992	5.10541	GRHL2	Homo sapiens grainyhead-like 2 (Drosophila) (GRHL2), mRNA.
ILMN_8822	0	6.7959	6.72887	6.49048	4.63593	KCNMB1	Homo sapiens potassium large conductance calcium-activated channel, subfamily M, beta member 1 (KCNMB1), mRNA.
ILMN_172727	0	7.3796	6.86131	5.62151	4.35059	PRDM14	Homo sapiens PR domain containing 14 (PRDM14), mRNA.
ILMN_12370	0	6.87308	6.6479	7.12962	4.29185	SFN	Homo sapiens stratifin (SFN), mRNA.
ILMN_25193	0	6.99431	5.90887	7.87887	4.19015	CGA	Homo sapiens glycoprotein hormones, alpha polypeptide (CGA), mRNA.
ILMN_23476	0	6.9863	6.27434	8.51174	4.85901	S100P	Homo sapiens S100 calcium binding protein P (S100P), mRNA.
ILMN_29440	0	7.09955	6.48208	8.11897	5.18228	VTCN1	Homo sapiens V-set domain containing T cell activation inhibitor 1 (VTCN1), mRNA.
ILMN_1899	0	6.22803	5.19709	7.35327	5.97413	HOP	Homo sapiens homeodomain-only protein (HOP), transcript variant 3, mRNA.
ILMN_26083	0	6.5652	5.61515	7.38426	6.25408	C12ORF46	Homo sapiens endoplasmic reticulum protein 27 kDa (ERP27), mRNA.
ILMN_22283	0	6.36774	5.40658	7.83306	5.73581	SLN	Homo sapiens sarcolipin (SLN), mRNA.
ILMN_17259	0	10.5802	6.52851	9.76148	3.60162	NALP2	Homo sapiens NLR family, pyrin domain containing 2 (NLRP2), mRNA.
ILMN_137791	0	5.73411	6.59965	6.34959	5.92523	LOC647881	PREDICTED: Homo sapiens similar to Absent in melanoma 1 protein, transcript variant 2 (LOC647881), mRNA.
ILMN_10425	0	6.22373	6.79379	6.65011	6.33899	TCERG1L	Homo sapiens transcription elongation regulator 1-like (TCERG1L), mRNA.
ILMN_5754	0	6.14823	6.60688	5.90082	5.63861	GRB7	Homo sapiens growth factor receptor-bound protein 7 (GRB7), transcript variant 2, mRNA.
ILMN_22211	0	6.36653	6.72163	6.00607	5.74344	SEMA4A	Homo sapiens sema domain, immunoglobulin domain (Ig), transmembrane domain (TM) and short cytoplasmic domain, (semaphorin) 4A (SEMA4A), mRNA.
ILMN_24032	0	6.26956	6.28211	5.95422	5.66688	SYT6	Homo sapiens synaptotagmin VI (SYT6), mRNA.
ILMN_10184	0	6.5846	6.82227	6.35746	6.14541	MARVELD3	Homo sapiens MARVEL domain containing 3 (MARVELD3), transcript variant 2, mRNA.
ILMN_20817	0	6.72794	6.98722	6.48346	6.21636	CHST6	Homo sapiens carbohydrate (N-acetylglucosamine 6-O) sulfotransferase 6 (CHST6), mRNA.
ILMN_29492	0	6.83929	7.10066	6.52266	6.00733	FGFR4	Homo sapiens fibroblast growth factor receptor 4 (FGFR4), transcript variant 2, mRNA.
ILMN_25213	0	6.84633	6.77657	6.64164	6.21216	PTPN6	Homo sapiens protein tyrosine phosphatase, non-receptor type 6 (PTPN6), transcript variant 2, mRNA.
ILMN_26382	0	6.49841	6.63473	6.20728	5.68237	SH2D3A	Homo sapiens SH2 domain containing 3A (SH2D3A), mRNA.
ILMN_18174	0	6.69148	6.76348	6.21093	5.87432	PPP2R2C	Homo sapiens protein phosphatase 2 (formerly 2A), regulatory subunit B (PR 52), gamma isoform (PPP2R2C), transcript variant 1, mRNA.
ILMN_20134	0.355634	6.26415	6.75231	6.11418	6.30763	PLEKHG6	Homo sapiens pleckstrin homology domain containing, family G (with RhoGef domain) member 6 (PLEKHG6), mRNA.
ILMN_179982	0	6.65051	6.96872	6.02111	6.12891	ADCY1	Homo sapiens adenylate cyclase 1 (brain) (ADCY1), mRNA.
ILMN_23840	0	6.12891	7.11036	5.17782	5.70351	TTYH1	Homo sapiens tweety homolog 1 (Drosophila) (TTYH1), transcript variant 2, mRNA.
ILMN_21715	0	6.24908	7.11433	5.55032	5.86564	LAMP3	Homo sapiens lysosomal-associated membrane protein 3 (LAMP3), mRNA.
ILMN_926	0	6.42734	5.65404	6.2488	6.13311	CD1D	Homo sapiens CD1D antigen, d polypeptide (CD1D), mRNA.
ILMN_2155	0	6.65181	5.95485	6.57408	5.93707	NALP7	Homo sapiens NLR family, pyrin domain containing 7 (NLRP7), transcript variant 2, mRNA.
ILMN_17319	0	6.8965	5.88501	6.09937	5.86425	NKD1	Homo sapiens naked cuticle homolog 1 (Drosophila) (NKD1), mRNA.
ILMN_4712	0	6.05727	6.00508	6.46603	6.39527	SERPINA5	Homo sapiens serpin peptidase inhibitor, clade A (alpha-1 antiproteinase, antitrypsin), member 5 (SERPINA5), mRNA.
ILMN_6052	0	6.2562	6.12192	6.37683	6.18405	CKMT1A	Homo sapiens creatine kinase, mitochondrial 1A (CKMT1A), nuclear gene encoding mitochondrial protein, mRNA.
ILMN_28065	0	5.99334	6.29522	6.37737	6.1594	SYT13	Homo sapiens synaptotagmin XIII (SYT13), mRNA.
ILMN_22491	0	6.17349	6.30044	6.60168	6.50346	MOBKL2B	Homo sapiens MOB1, Mps One Binder kinase activator-like 2B (yeast) (MOBKL2B), mRNA.
ILMN_5617	0	6.12658	6.3508	6.74884	6.55742	FLJ20130	Homo sapiens nucleoporin 62kDa C-terminal like (NUP62CL), mRNA.
ILMN_6413	0	6.40282	6.30288	6.66379	6.59914	TMEM27	Homo sapiens transmembrane protein 27 (TMEM27), mRNA.
ILMN_3962	0	5.75994	5.64982	6.74152	5.88394	CLEC1B	Homo sapiens C-type lectin domain family 1, member B (CLEC1B), mRNA.
ILMN_25079	0	6.14152	5.98629	6.48698	5.86009	SLC19A3	Homo sapiens solute carrier family 19, member 3 (SLC19A3), mRNA.
ILMN_18267	0	6.16201	5.44458	6.60551	6.29108	NOS3	Homo sapiens nitric oxide synthase 3 (endothelial cell) (NOS3), mRNA.
ILMN_3096	0	6.16633	5.81688	5.46999	6.67617	ARHGEF16	Homo sapiens Rho guanine exchange factor (GEF) 16 (ARHGEF16), mRNA.
ILMN_27922	0	6.18603	5.74869	6.08705	6.90517	CART1	Homo sapiens cartilage paired-class homeoprotein 1 (CART1), mRNA.
ILMN_27373	0	6.06699	6.28181	5.98265	7.08629	MEGF10	Homo sapiens multiple EGF-like-domains 10 (MEGF10), mRNA.
ILMN_26336	0	6.3708	6.39843	6.30008	6.87203	C15ORF42	Homo sapiens chromosome 15 open reading frame 42 (C15orf42), mRNA.
ILMN_170427	0	6.10153	6.12828	5.92058	6.74354	GPR98	Homo sapiens G protein-coupled receptor 98 (GPR98), transcript variant 2, transcribed RNA.
ILMN_29366	0	6.76884	6.50988	6.25259	7.13698	PLXDC2	Homo sapiens plexin domain containing 2 (PLXDC2), mRNA.
ILMN_4697	0	7.01287	6.53486	6.39644	7.1052	KIAA0514	Homo sapiens KIAA0514 (KIAA0514), mRNA.
ILMN_29431	0	6.70035	6.12338	6.00141	7.278	LRAT	Homo sapiens lecithin retinol acyltransferase (phosphatidylcholine--retinol O-acyltransferase) (LRAT), mRNA.
ILMN_17243	0	6.87679	5.85449	6.16698	6.5767	CDX2	Homo sapiens caudal type homeobox 2 (CDX2), mRNA.
ILMN_11528	0	6.59492	7.20024	6.57702	6.99797	PLA2G10	Homo sapiens phospholipase A2, group X (PLA2G10), mRNA.
ILMN_20684	0	6.83072	7.43688	6.71735	6.98937	TSPAN7	Homo sapiens tetraspanin 7 (TSPAN7), mRNA.
ILMN_29854	0	6.81294	7.17783	6.75798	6.69852	FLJ36445	Homo sapiens hypothetical protein FLJ36445 (FLJ36445), mRNA.
ILMN_11990	0	6.52801	6.72817	6.9703	6.38084	NPY	Homo sapiens neuropeptide Y (NPY), mRNA.
ILMN_27428	0	6.80732	6.81986	6.76315	6.63704	PDE9A	Homo sapiens phosphodiesterase 9A (PDE9A), transcript variant 5, mRNA.
ILMN_2604	0.779176	7.04048	6.81295	6.68395	6.73583	RPS6KA1	Homo sapiens ribosomal protein S6 kinase, 90kDa, polypeptide 1 (RPS6KA1), transcript variant 2, mRNA.
ILMN_29022	0.720454	6.94734	7.04347	6.69664	6.5032	LASS4	Homo sapiens LAG1 homolog, ceramide synthase 4 (LASS4), mRNA.
ILMN_12972	0.874686	7.02838	7.30654	6.83884	6.57479	SLC45A3	Homo sapiens solute carrier family 45, member 3 (SLC45A3), mRNA.
ILMN_26352	0	7.21387	6.95241	6.4402	6.53399	FZD5	Homo sapiens frizzled homolog 5 (Drosophila) (FZD5), mRNA.
ILMN_3749	0	7.0119	6.89811	6.60394	6.67602	IGSF21	Homo sapiens immunoglobin superfamily, member 21 (IGSF21), mRNA.
ILMN_16792	0	7.11984	6.95476	6.85641	6.48931	PROK2	Homo sapiens prokineticin 2 (PROK2), mRNA.
ILMN_13877	0	7.27687	7.06938	6.69107	6.67741	TMPRSS2	Homo sapiens transmembrane protease, serine 2 (TMPRSS2), mRNA.
ILMN_11087	0.123919	7.23357	6.55226	6.70316	6.12023	GNA14	Homo sapiens guanine nucleotide binding protein (G protein), alpha 14 (GNA14), mRNA.
ILMN_18161	0	7.47751	6.81578	6.96282	6.45911	RND1	Homo sapiens Rho family GTPase 1 (RND1), mRNA.
ILMN_3016	0	7.23698	7.08805	6.38544	7.44333	FLJ12505	Homo sapiens vasohibin 2 (VASH2), mRNA.
ILMN_10487	0	7.46417	7.02007	6.64311	7.26924	MATK	Homo sapiens megakaryocyte-associated tyrosine kinase (MATK), transcript variant 2, mRNA.
ILMN_26824	0	7.07569	6.96647	6.82222	7.27848	PPP1R16B	Homo sapiens protein phosphatase 1, regulatory (inhibitor) subunit 16B (PPP1R16B), mRNA.
ILMN_30356	0	6.73686	6.4513	6.65189	7.10265	GCNT2	Homo sapiens glucosaminyl (N-acetyl) transferase 2, I-branching enzyme (I blood group) (GCNT2), transcript variant 2, mRNA.
ILMN_13961	0	6.75749	6.37633	6.78037	7.3068	IQGAP2	Homo sapiens IQ motif containing GTPase activating protein 2 (IQGAP2), mRNA.
ILMN_18733	0	6.16069	6.5278	6.57837	7.52855	SELV	Homo sapiens selenoprotein V (SELV), mRNA.
ILMN_15159	0	6.1004	6.89957	7.09194	7.01878	UNQ3045	Homo sapiens chromosome 6 open reading frame 126 (C6orf126), mRNA.
ILMN_17363	0	6.00594	6.80116	6.46038	7.05322	PPP1R1A	Homo sapiens protein phosphatase 1, regulatory (inhibitor) subunit 1A (PPP1R1A), mRNA.
ILMN_9421	0	5.87688	6.98371	6.57163	6.9154	HRK	Homo sapiens harakiri, BCL2 interacting protein (contains only BH3 domain) (HRK), mRNA.
ILMN_22833	0	6.66452	7.16181	6.33114	7.50152	SCGB3A2	Homo sapiens secretoglobin, family 3A, member 2 (SCGB3A2), mRNA.
ILMN_30245	0	5.69739	5.6588	6.60217	7.90595	AMHR2	Homo sapiens anti-Mullerian hormone receptor, type II (AMHR2), mRNA.
ILMN_4884	0	5.554	6.10127	6.98023	7.86172	GADD45G	Homo sapiens growth arrest and DNA-damage-inducible, gamma (GADD45G), mRNA.
ILMN_8034	0	5.88177	6.12406	6.70319	8.07974	SOX17	Homo sapiens SRY (sex determining region Y)-box 17 (SOX17), mRNA.
ILMN_163808	0	6.18208	6.19844	6.82757	8.37719	CYP4X1	Homo sapiens cytochrome P450, family 4, subfamily X, polypeptide 1 (CYP4X1), mRNA.
ILMN_13691	0	6.12608	5.99164	6.1611	7.50858	DPPA2	Homo sapiens developmental pluripotency associated 2 (DPPA2), mRNA.
ILMN_166962	0	6.43891	6.28398	5.88595	7.76366	CER1	Homo sapiens cerberus 1, cysteine knot superfamily, homolog (Xenopus laevis) (CER1), mRNA.
ILMN_5809	0	5.83346	5.58895	5.20092	7.71908	HLA-DPB2	Homo sapiens major histocompatibility complex, class II, DP beta 2 (pseudogene) (HLA-DPB2) on chromosome 6.
ILMN_10339	0	5.24523	6.09839	6.33298	6.82999	NGFRAP1L1	Homo sapiens NGFRAP1-like 1 (NGFRAP1L1), mRNA.
ILMN_10988	0	5.5177	6.07992	6.09499	7.23662	CLDN3	Homo sapiens claudin 3 (CLDN3), mRNA.
ILMN_20321	0	8.07521	8.19705	7.74363	7.76577	C9ORF58	Homo sapiens chromosome 9 open reading frame 58 (C9orf58), transcript variant 2, mRNA.
ILMN_4778	0	8.23138	8.04845	7.85392	7.73924	NANOG	Homo sapiens Nanog homeobox (NANOG), mRNA.
ILMN_12918	0	7.89319	7.98234	7.77589	7.75562	ICA1	Homo sapiens islet cell autoantigen 1, 69kDa (ICA1), transcript variant 3, mRNA.
ILMN_19035	0	7.89088	7.77614	7.85422	8.10283	TMC6	Homo sapiens transmembrane channel-like 6 (TMC6), mRNA.
ILMN_28172	0	7.92754	8.23662	7.3989	7.76469	LRRN6A	Homo sapiens leucine rich repeat and Ig domain containing 1 (LINGO1), mRNA.
ILMN_3550	0	8.19873	7.93041	7.74095	7.94674	KAL1	Homo sapiens Kallmann syndrome 1 sequence (KAL1), mRNA.
ILMN_24078	0	8.44935	7.92405	7.76414	8.06276	SFRP2	Homo sapiens secreted frizzled-related protein 2 (SFRP2), mRNA.
ILMN_137249	0	8.36042	8.00287	7.47627	8.37681	GABRB3	PREDICTED: Homo sapiens gamma-aminobutyric acid (GABA) A receptor, beta 3 (GABRB3), mRNA.
ILMN_12372	0	8.30757	8.57599	8.02875	7.85161	TJP3	Homo sapiens tight junction protein 3 (zona occludens 3) (TJP3), mRNA.
ILMN_1597	0	8.28555	8.69048	7.82208	8.0207	PNCK	Homo sapiens pregnancy upregulated non-ubiquitously expressed CaM kinase (PNCK), mRNA.
ILMN_23474	0.0502063	8.61784	8.58582	8.03223	8.18187	TMEM125	Homo sapiens transmembrane protein 125 (TMEM125), mRNA.
ILMN_20154	0	8.59308	8.5373	8.13542	8.12517	MYO5C	Homo sapiens myosin VC (MYO5C), mRNA.
ILMN_6970	0	7.66451	7.72942	8.805	7.64684	MYL4	Homo sapiens myosin, light chain 4, alkali; atrial, embryonic (MYL4), transcript variant 2, mRNA.
ILMN_7397	0	7.96461	7.982	8.47069	7.54981	SPON1	Homo sapiens spondin 1, extracellular matrix protein (SPON1), mRNA.
ILMN_17004	0.580028	7.86003	8.08091	8.68535	8.00174	MYL7	Homo sapiens myosin, light chain 7, regulatory (MYL7), mRNA.
ILMN_139058	0	8.05415	7.33772	8.17163	8.87281	AGTRL1	Homo sapiens angiotensin II receptor-like 1 (AGTRL1), mRNA.
ILMN_19723	0	7.83945	8.34006	8.35087	9.01501	SLC16A9	Homo sapiens solute carrier family 16, member 9 (monocarboxylic acid transporter 9) (SLC16A9), mRNA.
ILMN_1964	1.30605	7.19733	7.04552	7.51386	8.37794	PACSIN1	Homo sapiens protein kinase C and casein kinase substrate in neurons 1 (PACSIN1), mRNA.
ILMN_12382	0	8.23474	8.60714	7.96103	7.37364	BTBD4	Homo sapiens zinc finger and BTB domain containing 46 (ZBTB46), mRNA.
ILMN_1784	0	8.39144	8.1569	8.21392	7.4886	CLDN10	Homo sapiens claudin 10 (CLDN10), transcript variant 2, mRNA.
ILMN_167822	0	8.59352	7.908	7.55434	7.14456	T	Homo sapiens T, brachyury homolog (mouse) (T), mRNA.
ILMN_167384	0	8.54629	8.17973	7.87784	6.79757	C1ORF187	Homo sapiens chromosome 1 open reading frame 187 (C1orf187), mRNA.
ILMN_12054	0	8.7091	8.79735	7.88899	6.76997	C9ORF61	Homo sapiens chromosome 9 open reading frame 61 (C9orf61), mRNA.
ILMN_138668	0	8.14047	8.86049	7.20845	7.79135	KLKB1	Homo sapiens kallikrein B, plasma (Fletcher factor) 1 (KLKB1), mRNA.
ILMN_15789	0	7.819	7.73325	7.56115	6.71424	OGDHL	Homo sapiens oxoglutarate dehydrogenase-like (OGDHL), mRNA.
ILMN_23166	0	8.194	8.0818	7.51979	6.69317	CLDN6	Homo sapiens claudin 6 (CLDN6), mRNA.
ILMN_13615	0.694165	7.69151	7.61088	7.1685	6.88376	ELF3	Homo sapiens E74-like factor 3 (ets domain transcription factor, epithelial-specific ) (ELF3), mRNA.
ILMN_14477	0.512824	7.65288	7.9317	6.9493	7.16056	GNG4	Homo sapiens guanine nucleotide binding protein (G protein), gamma 4 (GNG4), mRNA.
ILMN_19616	0	7.49387	7.62649	6.85903	7.21205	SMPDL3B	Homo sapiens sphingomyelin phosphodiesterase, acid-like 3B (SMPDL3B), transcript variant 1, mRNA.
ILMN_177587	0	7.50075	7.53292	6.94464	7.25824	FLJ12684	Homo sapiens hypothetical protein FLJ12684 (FLJ12684), mRNA. XR_001254
ILMN_3986	0	7.61524	7.74342	6.96946	7.32156	PDZD4	Homo sapiens PDZ domain containing 4 (PDZD4), mRNA.
ILMN_18644	0	7.79313	7.44758	6.92319	7.08745	FZD3	Homo sapiens frizzled homolog 3 (Drosophila) (FZD3), mRNA.
ILMN_5663	0	7.3395	7.49915	7.22903	6.95256	RRAGD	Homo sapiens Ras-related GTP binding D (RRAGD), mRNA.
ILMN_162864	0	7.3268	7.54336	7.21801	7.19797	SORL1	Homo sapiens sortilin-related receptor, L(DLR class) A repeats-containing (SORL1), mRNA.
ILMN_27857	0	7.29062	7.80855	7.26072	7.10569	HLA-DOA	Homo sapiens major histocompatibility complex, class II, DO alpha (HLA-DOA), mRNA.
ILMN_9711	0.0254867	7.2793	7.45268	7.69032	7.18525	C21ORF129	Homo sapiens chromosome 21 open reading frame 129 (C21orf129), mRNA.
ILMN_7726	0	6.5535	7.17421	7.26953	7.55561	NSUN7	Homo sapiens NOL1/NOP2/Sun domain family, member 7 (NSUN7), mRNA.
ILMN_24865	0	7.08855	7.65156	6.79254	8.06875	RPRML	Homo sapiens reprimo-like (RPRML), mRNA.
ILMN_28089	0	7.17853	7.43304	6.99574	7.66431	C20ORF160	Homo sapiens chromosome 20 open reading frame 160 (C20orf160), mRNA.
ILMN_23783	0	6.84624	7.7587	7.34047	7.39417	GOLT1A	Homo sapiens golgi transport 1 homolog A (S. cerevisiae) (GOLT1A), mRNA.
ILMN_3458	0.817098	6.87114	7.11622	6.63398	7.4632	YBX2	Homo sapiens Y box binding protein 2 (YBX2), mRNA.
ILMN_4673	0	7.70226	7.54201	7.56487	7.78882	GAD1	Homo sapiens glutamate decarboxylase 1 (brain, 67kDa) (GAD1), transcript variant GAD25, mRNA.
ILMN_1091	0.0254456	7.44392	7.68656	7.72531	7.895	C6ORF60	Homo sapiens chromosome 6 open reading frame 60 (C6orf60), mRNA.
ILMN_773	0	7.44804	7.85234	7.81817	7.58941	MAP4K1	Homo sapiens mitogen-activated protein kinase kinase kinase kinase 1 (MAP4K1), mRNA.
ILMN_4065	0	7.55636	7.69337	7.26909	7.76032	2010-09-03	Homo sapiens septin 3 (SEPT3), transcript variant B, mRNA.
ILMN_2460	0	7.75805	7.85981	7.30827	7.82554	UGT3A2	Homo sapiens UDP glycosyltransferase 3 family, polypeptide A2 (UGT3A2), mRNA.
ILMN_3642	0.604331	7.50932	7.27677	7.86702	8.12486	LAMC3	Homo sapiens laminin, gamma 3 (LAMC3), mRNA.
ILMN_174345	0.212556	6.77712	6.7349	6.45041	7.89741	SCG3	Homo sapiens secretogranin III (SCG3), mRNA.
ILMN_16264	0	6.78672	6.68038	6.56193	8.06779	CHST9	Homo sapiens carbohydrate (N-acetylgalactosamine 4-0) sulfotransferase 9 (CHST9), mRNA.
ILMN_3168	0	7.20435	6.78491	6.56415	7.71563	PTPRZ1	Homo sapiens protein tyrosine phosphatase, receptor-type, Z polypeptide 1 (PTPRZ1), mRNA.
ILMN_3950	0	7.22225	6.37232	6.73637	8.17907	C14ORF29	Homo sapiens abhydrolase domain containing 12B (ABHD12B), transcript variant 2, mRNA.
ILMN_23980	0	6.55985	6.60437	6.46798	8.47754	CYP26A1	Homo sapiens cytochrome P450, family 26, subfamily A, polypeptide 1 (CYP26A1), transcript variant 1, mRNA.
ILMN_13175	0.929158	7.22166	6.68992	6.96639	8.04954	BMP7	Homo sapiens bone morphogenetic protein 7 (osteogenic protein 1) (BMP7), mRNA.
ILMN_8583	0.725439	6.94302	6.91101	6.57346	8.37248	CHST13	Homo sapiens carbohydrate (chondroitin 4) sulfotransferase 13 (CHST13), mRNA.
ILMN_21972	0	7.70301	7.00578	7.31654	8.16976	GATM	Homo sapiens glycine amidinotransferase (L-arginine:glycine amidinotransferase) (GATM), mRNA.
ILMN_24568	0	8.12633	7.2796	6.78876	8.01746	MIXL1	Homo sapiens Mix1 homeobox-like 1 (Xenopus laevis) (MIXL1), mRNA.
ILMN_168722	0	7.47886	6.89489	6.62483	8.19146	USP44	Homo sapiens ubiquitin specific peptidase 44 (USP44), transcript variant 2, mRNA.
ILMN_20950	0	7.41614	7.08442	7.17165	7.70097	CDS1	Homo sapiens CDP-diacylglycerol synthase (phosphatidate cytidylyltransferase) 1 (CDS1), mRNA.
ILMN_7668	0	7.27645	7.17014	7.16827	7.89204	C20ORF46	Homo sapiens chromosome 20 open reading frame 46 (C20orf46), mRNA.
ILMN_21875	0	7.24572	7.36875	7.36869	7.67199	SYT4	Homo sapiens synaptotagmin IV (SYT4), mRNA.
ILMN_173016	0	7.18038	6.96299	7.58432	7.5814	MERTK	Homo sapiens c-mer proto-oncogene tyrosine kinase (MERTK), mRNA.
ILMN_21438	0	7.49558	6.87471	7.56278	7.666	DSC2	Homo sapiens desmocollin 2 (DSC2), transcript variant Dsc2a, mRNA.
ILMN_22036	0	7.64437	6.87474	7.43526	7.84198	LRFN5	Homo sapiens leucine rich repeat and fibronectin type III domain containing 5 (LRFN5), mRNA.
ILMN_138278	0	7.4565	7.08004	7.40888	7.68021	FAM69B	PREDICTED: Homo sapiens family with sequence similarity 69, member B, transcript variant 2 (FAM69B), mRNA.
ILMN_25404	0	8.02484	6.76365	6.97593	7.21583	SPINK1	Homo sapiens serine peptidase inhibitor, Kazal type 1 (SPINK1), mRNA.
ILMN_13361	0	8.20807	6.67939	7.33158	7.1714	APOA4	Homo sapiens apolipoprotein A-IV (APOA4), mRNA.
ILMN_823	0	7.88987	7.2583	7.40903	7.02529	KCNF1	Homo sapiens potassium voltage-gated channel, subfamily F, member 1 (KCNF1), mRNA.
ILMN_28506	0	7.83709	7.1145	7.52609	7.11397	DKFZP564O0823	Homo sapiens DKFZP564O0823 protein (DKFZP564O0823), mRNA.
ILMN_9090	0	6.80566	6.78161	7.46422	8.30254	CCKBR	Homo sapiens cholecystokinin B receptor (CCKBR), mRNA.
ILMN_137904	0	7.3347	6.37098	8.18855	7.89441	HOXB5	Homo sapiens homeo box B5 (HOXB5), mRNA.
ILMN_9545	0	6.42644	6.19102	8.30858	8.4319	TMEM88	Homo sapiens transmembrane protein 88 (TMEM88), mRNA.
ILMN_697	0.742582	6.96928	6.24942	7.45461	7.21909	ADAMTSL2	Homo sapiens ADAMTS-like 2 (ADAMTSL2), mRNA.
ILMN_14320	1.06427	7.58159	7.04993	8.1774	6.9922	EFNA1	Homo sapiens ephrin-A1 (EFNA1), transcript variant 1, mRNA.
